# Supplementary material for: Bayesian inference-based estimation of hourly primary and secondary organic carbon in suburban Hong Kong: multi-temporal-scale variations and evolution characteristics during PM 2.5 episodes
Source: Copernicus journal article supplement (doi:10.5194/acp-24-5803-2024), 2024-05-22
Supplement: Supplementary file 1 [file acp-24-5803-2024-supplement.pdf]

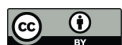

*Supplement of*

**Bayesian inference-based estimation of hourly primary and secondary organic carbon in suburban Hong Kong: multi-temporal-scale variations and evolution characteristics during PM<sub>2.5</sub> episodes**

**Shan Wang et al.**

*Correspondence to:* Jian Zhen Yu ([jian.yu@ust.hk](mailto:jian.yu@ust.hk))

The copyright of individual parts of the supplement might differ from the article licence.

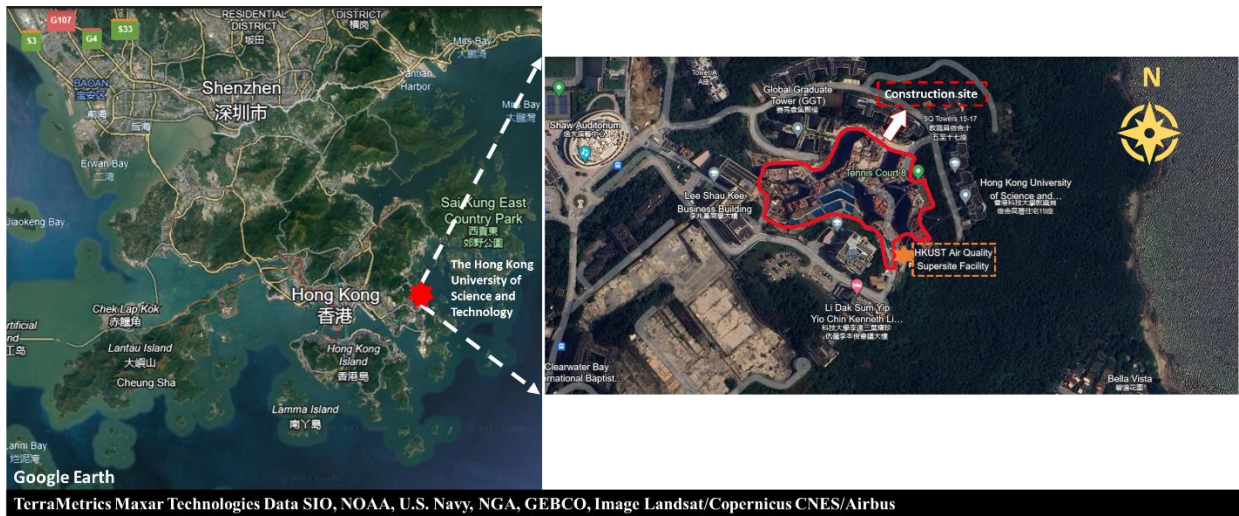

Figure S1. Location of sampling site and the surrounding environment (map data: © Google Earth, TerraMetrics Maxar Technologies Data SIO, NOAA, U.S. Navy, NGA, GEBCO, Image Landsat/Copernicus CNES/Airbus).

5

### S1 The $PM_{2.5}$ correction

The hourly  $PM_{2.5}$  concentrations measured by SHARP were biased, evidenced by the measured SHARP  $PM_{2.5}$  concentrations consistently falling below the reconstructed speciation data (Figure S2a). The magnitude of bias was determined by comparing the SHARP-measured  $PM_{2.5}$  with those 24-h offline filter measurements during the campaign period. The SHARP  $PM_{2.5}$  showed similar temporal variations with the offline filter measurements (Figure S2b). Strong correlations were observed between SHARP  $PM_{2.5}$  and filter-based  $PM_{2.5}$ , with  $R_p$  values ranging from 0.74 to 0.98. The SHARP  $PM_{2.5}$  levels were corrected using the linear relationships shown in Figure S2c.

10

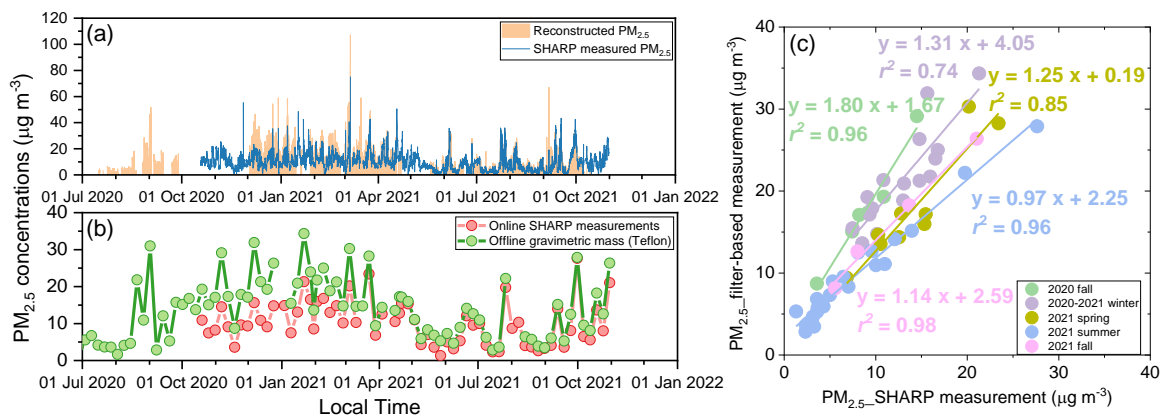

Figure S2. (a) Time series of hourly reconstructed  $PM_{2.5}$  and SHARP measured  $PM_{2.5}$ . (b) Time series of daily SHARP measured  $PM_{2.5}$  and offline gravimetric mass (Teflon). (c) Linear relationship between online and offline filter-based  $PM_{2.5}$  data during the campaign period.

15

## S2 Aerosol water content and pH verification

20 Figure S3 shows the comparisons of predicted and measured  $\text{HNO}_3$ ,  $\text{NO}_3^-$ , and  $\epsilon(\text{HNO}_3)$ , and  $\text{NH}_3$ ,  $\text{NH}_4^+$  and  $\epsilon(\text{NH}_4^+)$  for summer and winter episode cases. The gas-particle phase partitioning of  $\text{HNO}_3$ , namely  $\epsilon(\text{HNO}_3)$ , is described as gas-phase  $\text{HNO}_3$  concentration divided by the sum of aerosol-phase  $\text{NO}_3^-$  and gas-phase  $\text{HNO}_3$ . Similarly, the  $\epsilon(\text{NH}_4^+)$  is calculated as aerosol-phase  $\text{NH}_4^+$  divided by the sum of aerosol-phase  $\text{NH}_4^+$  and gas-phase  $\text{NH}_3$ .

25 The partitioning ratios for summer and winter episode cases were as follows:  $\epsilon(\text{NH}_4^+) = 49 \pm 18\%$  and  $61 \pm 17\%$  for summer and winter,  $\epsilon(\text{HNO}_3) = 28 \pm 9.2\%$  and  $17 \pm 8.0\%$  for summer and winter, respectively. Good correlations were observed between the predicted and measured gas-phase  $\text{HNO}_3$ , aerosol-phase  $\text{NO}_3^-$  and  $\epsilon(\text{HNO}_3)$ , with  $R_p$  ranging from 0.56-0.86. Despite the good correlations, ISOROPPIA-II predicted gas-phase  $\text{HNO}_3$  was systematically higher than measured value, with regression slopes of larger than 2.0. This could be attributed to the underestimate of  $\text{HNO}_3$  measured by MARGA system (Makkonen et al., 2014). Regarding the aerosol-phase  $\text{NO}_3^-$ , the ISOROPPIA-II underpredicted the values with regression slope of 0.62 and 0.82 in summer and winter, respectively. This leads to a regression slope of higher than 1 comparing predicted to measured  $\epsilon(\text{HNO}_3)$ . In contrast, predicted versus measured gas-phase  $\text{NH}_3$ , aerosol-phase  $\text{NH}_4^+$  and  $\epsilon(\text{NH}_4^+)$  is close to 1:1 and highly correlated ( $R_p$ : 0.77-0.96). The overall good correlations between the predicted and measured values of  $\text{NH}_4^+$ ,  $\text{NO}_3^-$ , gas-phase  $\text{NH}_3$  and  $\epsilon(\text{NH}_4^+)$  suggest the precision and consistent utility of thermodynamic equilibrium model in the quantification of  $\text{PM}_{2.5}$  aerosol water content and acidity.

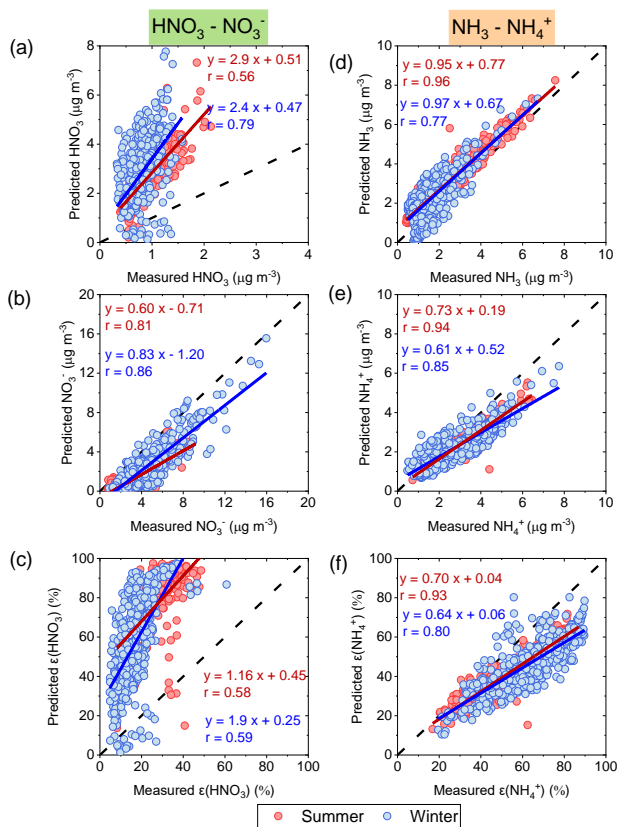

Figure S3. Comparisons of (a, b, c) predicted and measured  $\text{HNO}_3$ ,  $\text{NO}_3^-$ , and  $\epsilon(\text{HNO}_3)$ ; and (d, e, f)  $\text{NH}_3$ ,  $\text{NH}_4^+$ , and  $\epsilon(\text{NH}_4^+)$  for summer and winter episode cases.

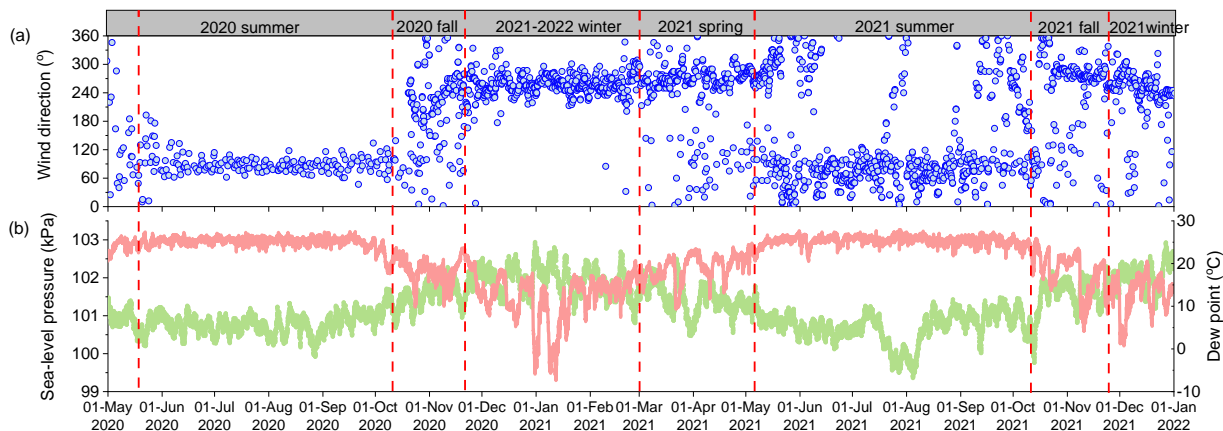

45 **Figure S4. Time series of (a) upper wind direction at  $15000 \pm 1000$  m height, and (b) sea-level pressure and dew point at Hong Kong Observatory station from 1 May 2021 to 31 December 2021.**

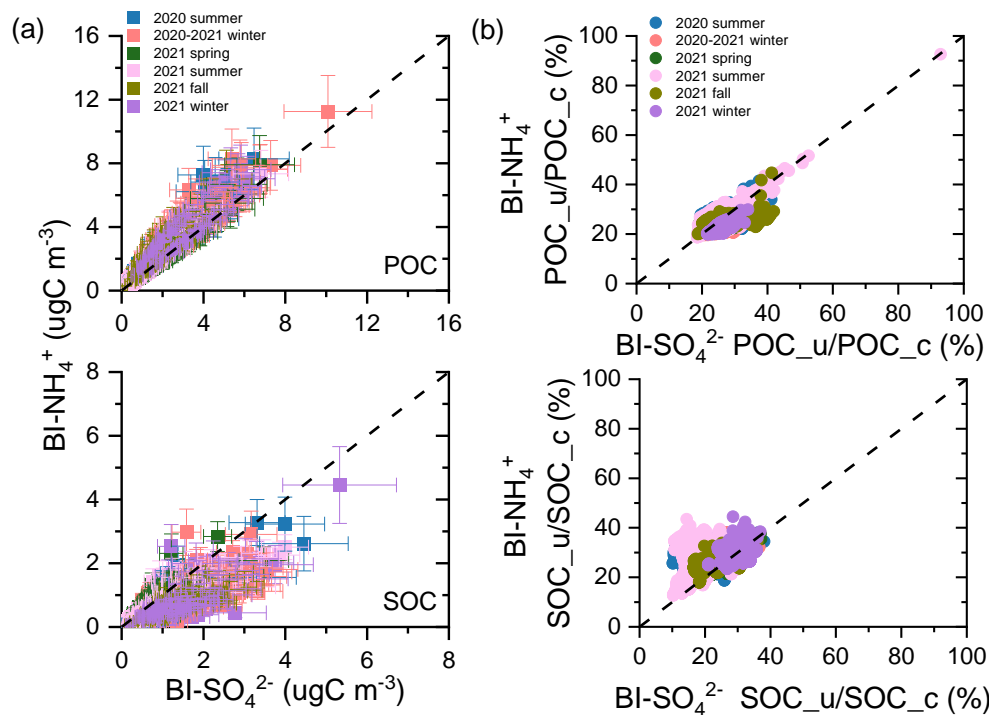

**Figure S5. Comparison of (a) absolute concentration and absolute uncertainties (represented in error bar), and (b) relative uncertainty of POC and SOC between BI with sulfate and ammonium as tracers for SOC.**

**Table S1. Model performance evaluation metrics (Bayesian Inference Criterion, BIC)<sup>a</sup> for individual seasons using sulfate, nitrate and ammonium as tracers for SOC.**

| Tracers / Period | SO <sub>4</sub> <sup>2-</sup> | NO <sub>3</sub> <sup>-</sup> | NH <sub>4</sub> <sup>+</sup> |
|------------------|-------------------------------|------------------------------|------------------------------|
| 2020 summer      | <b>2247</b>                   | 3150                         | 2713                         |
| 2020-2021 winter | <b>6266</b>                   | 6768                         | 7065                         |
| 2021 spring      | <b>10525</b>                  | 10731                        | 13450                        |
| 2021 summer      | 15951                         | 16491                        | <b>14511</b>                 |
| 2021 fall        | <b>2614</b>                   | 3793                         | 4117                         |
| 2021 winter      | <b>2445</b>                   | 2449                         | 2600                         |
| Entire           | <b>40047</b>                  | 43382                        | 44456                        |

<sup>a</sup>Note: bold numbers are the minimum value, represents the most optimal model performance.

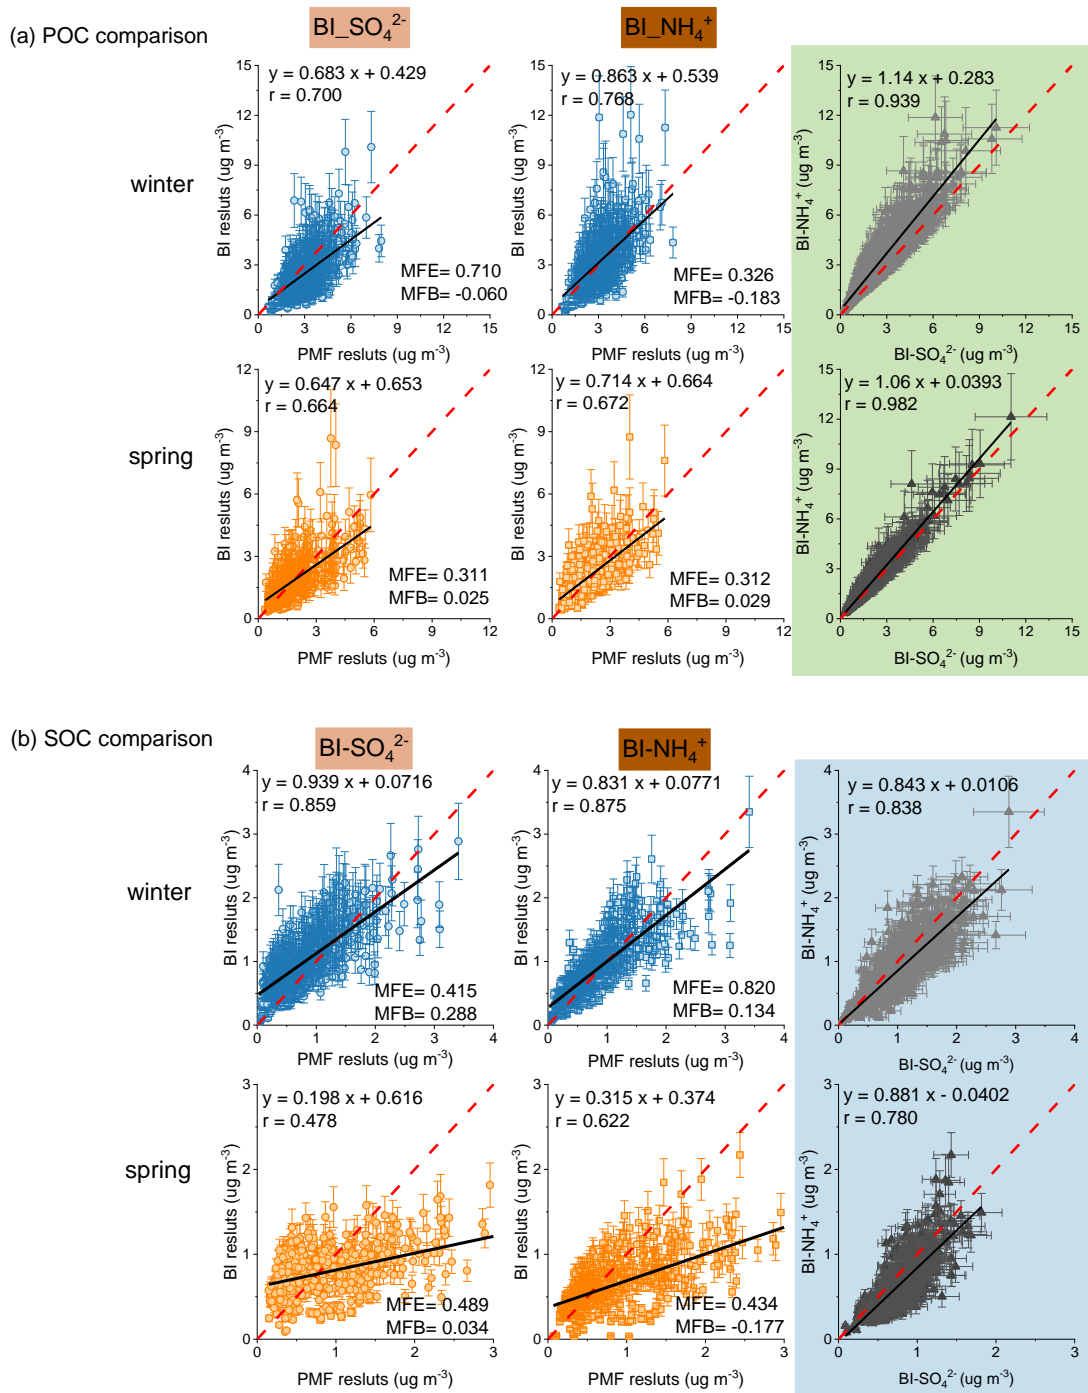

60 **Figure S6. (a) POC and (b) SOC estimations for the HKUST winter (24 November 2020 – 28 February 2021) and spring (1 March -2 May 2021) data. Results comparison between PMF and BI with sulfate and ammonium as tracers for SOC.**

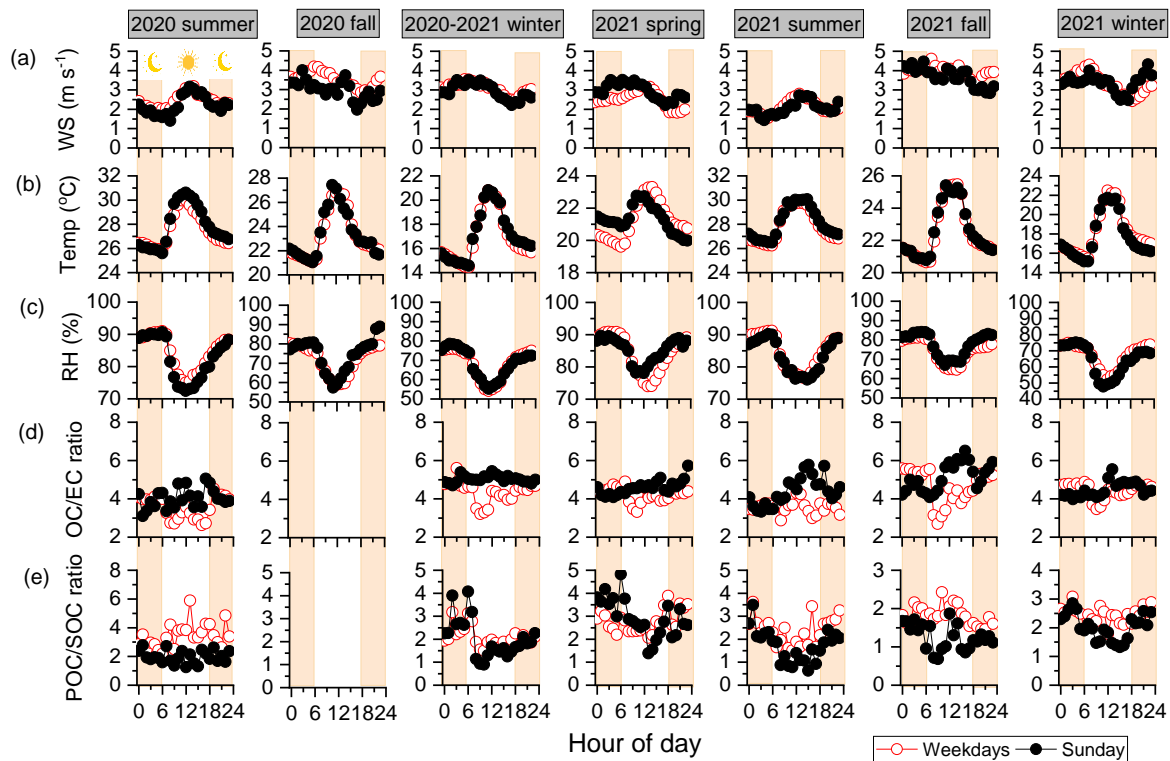

65 **Figure S7.** Diurnal variations of (a) wind speed, (b) temperature, (c) RH, and (d) OC/EC ratio and (e) POC/SOC ratio over the entire measurement period. The circles represent the hourly data averaged over weekdays (Monday -Saturday, red) and Sunday (black). The yellow shades represent nighttime periods.

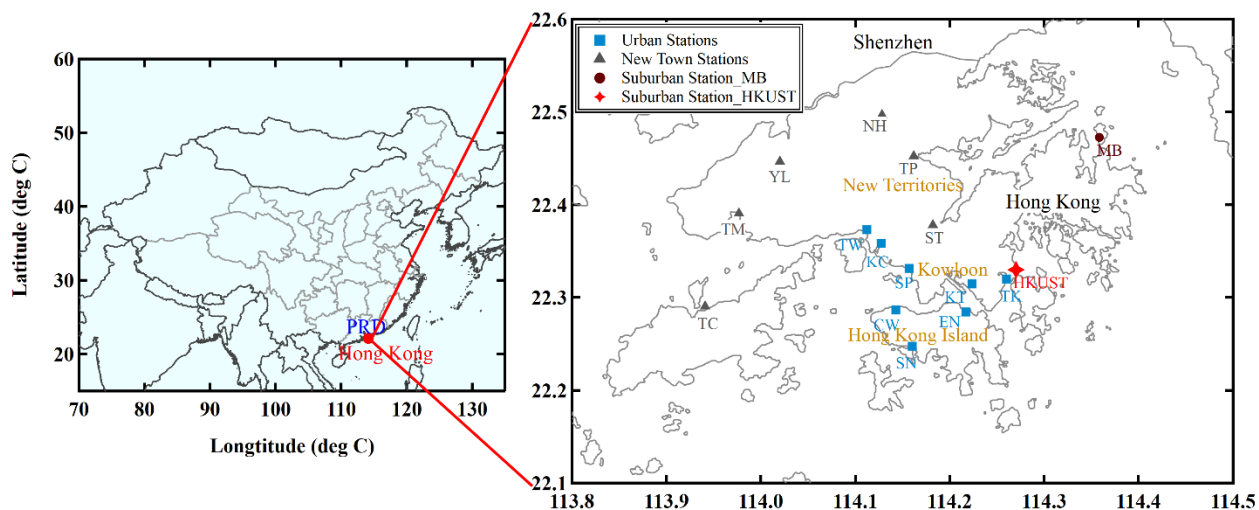

70 **Figure S8.** Geographical locations of the 15 HKEPD general air quality monitoring stations and the HKUST supersite.



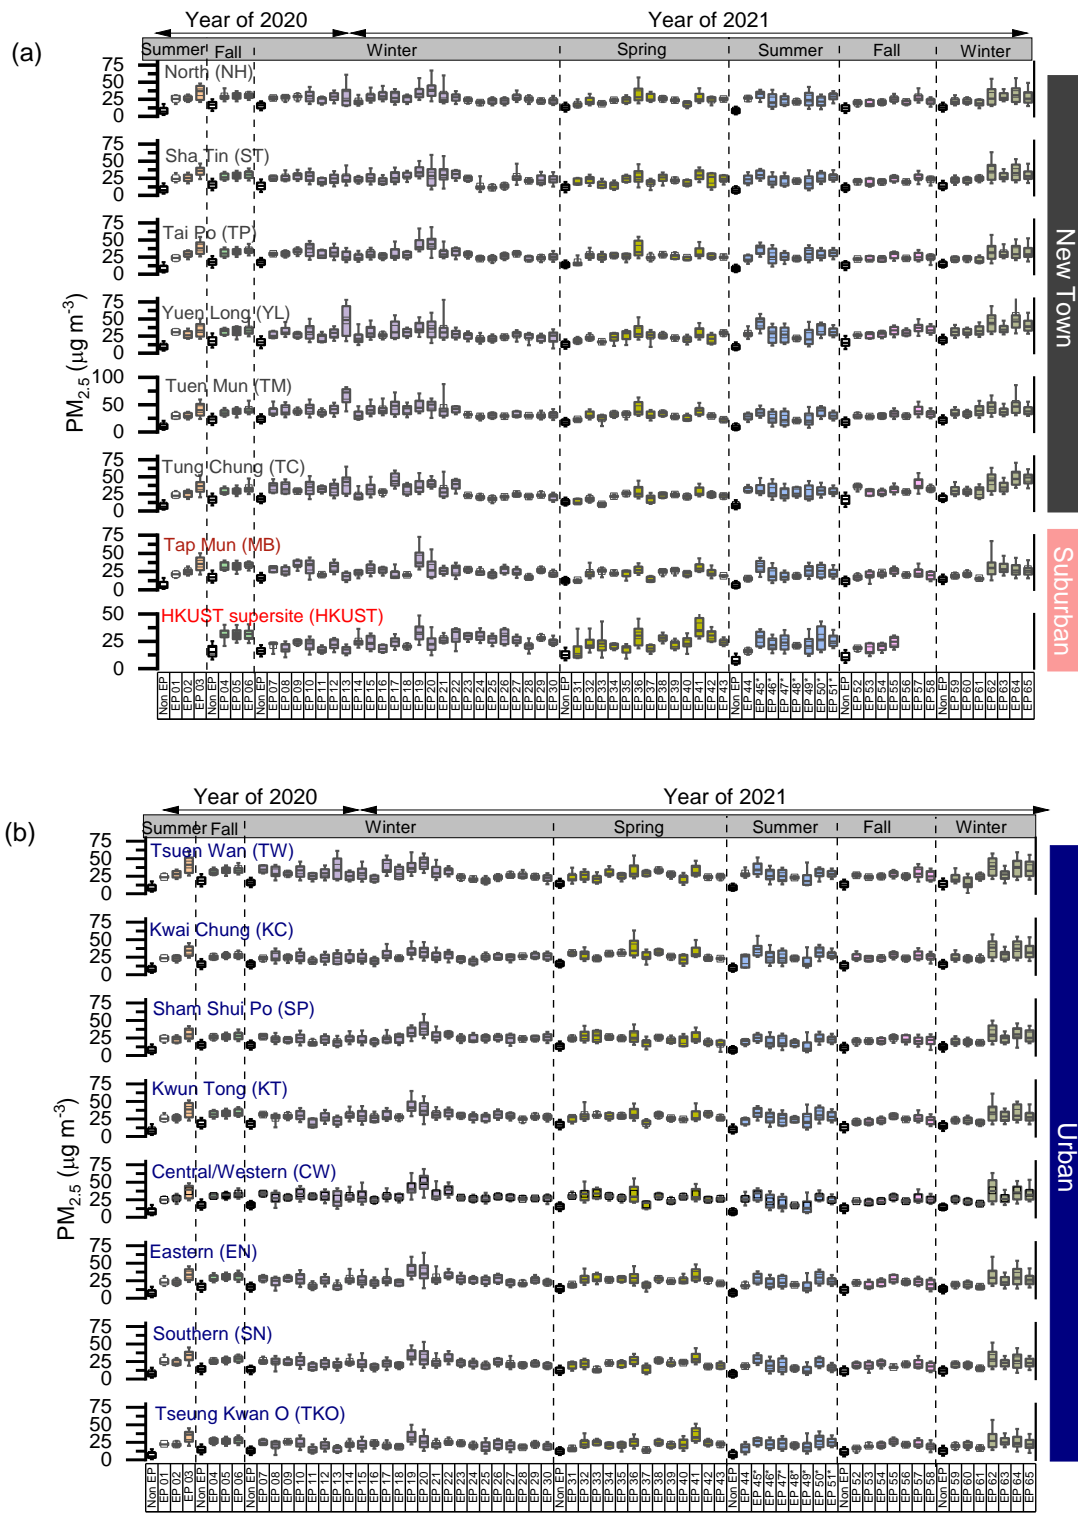

75 **Figure S9.** The average concentrations of PM<sub>2.5</sub> during individual episodes (solid pattern) and those during the non-episode hours in the same season (blank pattern) in the 15 HKEPD general air quality monitoring stations and the HKUST supersite in HK.



**Table S2. Statistical summary of PM<sub>2.5</sub> at 15 Hong Kong EPD general air quality monitoring stations and the HKUST supersite during the 65 episodes and the remaining non-episode hours for the period from 16 July 2020 to 31 December 2021. Meteorological parameters and gas pollutant data are from the HKUST supersite. The NO<sub>x</sub> and O<sub>3</sub> at MB station were used as reference during the missing period.**

| Episode | Season           | Time period (date, time)    | Duration (h) | Wind speed (m s <sup>-1</sup> ) | T (°C) | RH (%) | O <sub>3</sub> (ppb) | NO <sub>x</sub> (ppb) | Mean PM <sub>2.5</sub> concentrations |      |      |            |
|---------|------------------|-----------------------------|--------------|---------------------------------|--------|--------|----------------------|-----------------------|---------------------------------------|------|------|------------|
|         |                  |                             |              |                                 |        |        |                      |                       | City-wide                             | Min  | Max  | Max-to-min |
| EP01    | 2020 summer      | 21 Aug, 09:00-22 Aug, 22:00 | 38           | 1.71                            | 28.9   | 78.6   | 33.4                 | 4.8                   | 24.9                                  | 21.1 | 31.0 | 1.5        |
| EP02    | 2020 summer      | 29 Aug, 10:00-31 Aug, 23:00 | 38           | 1.64                            | 29.4   | 76.2   | 58.7                 | 5.4                   | 25.7                                  | 22.1 | 30.1 | 1.4        |
| EP03    | 2020 summer      | 01 Sep, 12:00-04 Sep, 23:00 | 84           | 1.36                            | 29.5   | 79.2   | 60.2                 | 7.1                   | 36.0                                  | 30.9 | 41.7 | 1.3        |
| Non-EP  | 2020 summer      | 16 July, 00:00-7 Oct, 23:00 | 1841         | 2.47                            | 27.4   | 84.5   | 53.8                 | 4.9                   | 8.50                                  | 7.10 | 10.6 | 1.5        |
| EP04    | 2020 fall        | 29 Oct, 19:00-30 Oct, 20:00 | 26           | 2.39                            | 22.6   | 82.3   | 38.2                 | 7.9                   | 29.4                                  | 25.4 | 35.2 | 1.4        |
| EP05    | 2020 fall        | 02 Nov, 09:00-04 Nov, 21:00 | 61           | 3.91                            | 23.2   | 65.5   | 57.8                 | 8.9                   | 30.5                                  | 26.7 | 37.7 | 1.4        |
| EP06    | 2020 fall        | 06 Nov, 11:00-10 Nov, 23:00 | 109          | 3.38                            | 24.2   | 57.1   | 68.9                 | 11                    | 32.7                                  | 28.2 | 40.6 | 1.4        |
| Non-EP  | 2020 fall        | 08 Oct, 00:00-23 Nov, 23:00 | 932          | 3.46                            | 23.2   | 74.3   | 52.8                 | 6.6                   | 17.1                                  | 14.4 | 22.8 | 1.6        |
| EP07    | 2020-2021 winter | 24 Nov, 08:00-19:00         | 11           | 3.24                            | 23.5   | 73.2   | 48.5                 | 14                    | 29.4                                  | 23.2 | 38.3 | 1.7        |
| EP08    | 2020-2021 winter | 26 Nov, 10:00-27 Nov, 03:00 | 18           | 2.01                            | 23.2   | 79.1   | 59.8                 | 8.0                   | 27.7                                  | 20.2 | 38.8 | 1.9        |
| EP09    | 2020-2021 winter | 02 Dec, 19:00-03 Dec, 11:00 | 17           | 5.55                            | 16.5   | 66.2   | 28.9                 | 9.2                   | 28.5                                  | 22.4 | 37.3 | 1.7        |
| EP10    | 2020-2021 winter | 05 Dec, 00:00-14 Dec 00:00  | 239          | 2.59                            | 18.6   | 74.1   | 42.4                 | 11                    | 30.8                                  | 24.2 | 43.2 | 1.8        |
| EP11    | 2020-2021 winter | 17 Dec, 11:00-23:00         | 13           | 2.90                            | 15.0   | 66.3   | 6.60                 | 25                    | 23.0                                  | 14.5 | 35.1 | 2.4        |
| EP12    | 2020-2021 winter | 19 Dec, 13:00-25 Dec 23:00  | 155          | 3.63                            | 16.3   | 68.5   | 37.8                 | 8.9                   | 28.3                                  | 20.6 | 41.5 | 2.0        |
| EP13    | 2020-2021 winter | 27 Dec, 11:00-28 Dec, 11:00 | 25           | 1.89                            | 20.5   | 58.0   | 61.5                 | 5.1                   | 29.3                                  | 15.6 | 65.8 | 4.2        |
| EP14    | 2020-2021 winter | 29 Dec, 00:00-30 Dec, 05:00 | 30           | 2.67                            | 19.2   | 73.5   | 43.0                 | 10                    | 25.5                                  | 21.7 | 32.0 | 1.5        |
| EP15    | 2020-2021 winter | 03 Jan, 03:00-08 Jan, 23:00 | 141          | 3.44                            | 14.4   | 64.0   | 45.6                 | 8.1                   | 29.1                                  | 22.6 | 42.2 | 1.9        |
| EP16    | 2020-2021 winter | 12 Jan, 00:00-23:00         | 24           | 5.52                            | 11.4   | 22.0   | 40.4                 | 10                    | 25.1                                  | 17.2 | 41.5 | 2.4        |
| EP17    | 2020-2021 winter | 14 Jan, 05:00-23:00         | 19           | 1.81                            | 15.0   | 45.7   | 64.7                 | 12                    | 30.5                                  | 20.4 | 47.8 | 2.3        |
| EP18    | 2020-2021 winter | 15 Jan, 15:00-16 Jan, 12:00 | 22           | 1.74                            | 15.9   | 61.5   | 78.0                 | 6.6                   | 26.8                                  | 18.7 | 41.2 | 2.2        |
| EP19    | 2020-2021 winter | 16 Jan, 22:00-19 Jan, 11:00 | 62           | 3.57                            | 14.0   | 56.7   | 54.6                 | 7.7                   | 39.2                                  | 33.1 | 49.2 | 1.5        |
| EP20    | 2020-2021 winter | 21 Jan, 22:00-24 Jan, 08:00 | 59           | 1.81                            | 20.2   | 73.1   | 39.1                 | 14                    | 38.1                                  | 27.7 | 51.5 | 1.9        |
| EP21    | 2020-2021 winter | 25 Jan, 04:00-27 Jan, 21:00 | 66           | 1.76                            | 17.6   | 78.5   | 56.2                 | 9.3                   | 30.9                                  | 22.7 | 44.1 | 1.9        |
| EP22    | 2020-2021 winter | 28 Jan, 08:00-23:00         | 16           | 3.16                            | 20.3   | 55.1   | 60.0                 | 7.9                   | 31.7                                  | 25.2 | 41.1 | 1.6        |
| EP23    | 2020-2021 winter | 29 Jan, 21:00-30 Jan, 16:00 | 20           | 3.21                            | 14.8   | 70.1   | 59.2                 | 4.2                   | 25.8                                  | 22.3 | 31.6 | 1.4        |
| EP24    | 2020-2021 winter | 02 Feb, 18:00-03 Feb, 11:00 | 18           | 3.78                            | 16.3   | 78.2   | 57.8                 | 3.7                   | 22.4                                  | 12.8 | 28.5 | 2.2        |
| EP25    | 2020-2021 winter | 06 Feb, 10:00-08 Feb, 14:00 | 53           | 2.03                            | 19.2   | 73.2   | 56.3                 | 8.8                   | 22.9                                  | 17.5 | 30.0 | 1.7        |
| EP26    | 2020-2021 winter | 09 Feb, 01:00-18:00         | 18           | 4.29                            | 16.3   | 82.7   | 56.8                 | 2.5                   | 24.8                                  | 13.7 | 31.1 | 2.3        |
| EP27    | 2020-2021 winter | 14 Feb, 17:00-15 Feb, 13:00 | 21           | 1.51                            | 20.6   | 60.9   | 51.8                 | 9.5                   | 25.9                                  | 19.7 | 32.1 | 1.6        |
| EP28    | 2020-2021 winter | 16 Feb, 20:00-17 Feb, 07:00 | 12           | 2.65                            | 17.3   | 72.1   | 49.1                 | 3.8                   | 23.1                                  | 17.3 | 29.9 | 1.7        |
| EP29    | 2020-2021 winter | 17 Feb, 22:00-18 Feb, 23:00 | 26           | 3.06                            | 16.6   | 68.6   | 49.5                 | 3.7                   | 24.8                                  | 21.7 | 29.9 | 1.4        |
| EP30    | 2020-2021 winter | 20 Feb, 12:00-22 Feb, 13:00 | 50           | 1.68                            | 18.8   | 76.9   | 68.0                 | 5.2                   | 24.1                                  | 18.8 | 31.3 | 1.7        |
| Non-EP  | 2020-2021 winter | 24 Nov, 00:00-28 Feb, 23:00 | 1192         | 3.24                            | 16.6   | 67.8   | 43.6                 | 6.9                   | 16.3                                  | 13.2 | 23.4 | 1.8        |
| EP31    | 2021 spring      | 01 Mar, 20:00-02 Mar, 06:00 | 11           | 2.32                            | 19.6   | 89.5   | 37.2                 | 13                    | 21.4                                  | 13.7 | 30.9 | 2.3        |
| EP32    | 2021 spring      | 04 Mar, 20:00-05 Mar, 23:00 | 39           | 1.74                            | 17.8   | 95.8   | 31.8                 | 7.3                   | 26.1                                  | 17.6 | 33.5 | 1.9        |
| EP33    | 2021 spring      | 06 Mar, 09:00-20:00         | 12           | 1.34                            | 18.9   | 99.9   | 34.5                 | 5.5                   | 22.6                                  | 9.60 | 34.1 | 3.6        |

|        |             |                               |      |      |      |      |      |     |      |      |      |     |
|--------|-------------|-------------------------------|------|------|------|------|------|-----|------|------|------|-----|
| EP34   | 2021 spring | 14 Mar, 10:00-23:00           | 14   | 2.11 | 19.2 | 85.3 | 67.7 | 5.7 | 25.4 | 15.0 | 32.5 | 2.2 |
| EP35   | 2021 spring | 21 Mar, 07:00-14:00           | 8    | 4.57 | 20.3 | 74.0 | 18.6 | 12  | 25.8 | 20.8 | 32.5 | 1.6 |
| EP36   | 2021 spring | 22 Mar, 16:00-25 Mar, 23:00   | 80   | 2.60 | 19.0 | 64.6 | 45.7 | 14  | 31.7 | 25.8 | 41.9 | 1.6 |
| EP37   | 2021 spring | 04 Apr, 10:00-23:00           | 14   | 2.64 | 21.7 | 97.5 | 46.1 | 5.8 | 21.1 | 13.9 | 30.8 | 2.2 |
| EP38   | 2021 spring | 05 Apr, 19:00-07 Apr, 21:00   | 32   | 2.31 | 21.3 | 85.2 | 67.9 | 5.4 | 27.7 | 23.0 | 33.9 | 1.5 |
| EP39   | 2021 spring | 09 Apr, 21:00-10 Apr, 09:00   | 13   | 4.07 | 19.2 | 76.7 | 50.6 | 5.1 | 24.3 | 21.2 | 28.1 | 1.3 |
| EP40   | 2021 spring | 17 Apr, 10:00-21:00           | 12   | 1.80 | 21.1 | 93.3 | 53.4 | 7.3 | 22.6 | 18.0 | 29.3 | 1.6 |
| EP41   | 2021 spring | 18 Apr, 11:00-19 Apr, 16:00   | 30   | 4.67 | 20.9 | 72.2 | 80.1 | 5.5 | 31.6 | 26.8 | 39.1 | 1.5 |
| EP42   | 2021 spring | 23 Apr, 08:00-22:00           | 15   | 1.91 | 28.1 | 69.0 | 48.7 | 32  | 24.1 | 17.9 | 32.1 | 1.8 |
| EP43   | 2021 spring | 02 May, 00:00-12:00           | 13   | 1.26 | 25.1 | 78.4 | 46.0 | 13  | 23.0 | 16.6 | 29.4 | 1.8 |
| Non-EP | 2021 spring | 01 Mar, 00:00-02 May, 23:00   | 1219 | 2.52 | 21.5 | 85.5 | 40.9 | 7.6 | 14.0 | 12.0 | 18.0 | 1.5 |
| EP44   | 2021 summer | 05 May, 14:00-23:00           | 10   | 2.18 | 26.0 | 81.5 | 70.3 | 19  | 23.0 | 15.2 | 31.0 | 2.0 |
| EP45   | 2021 summer | 05 June, 14:00-06 June, 23:00 | 34   | 1.65 | 27.2 | 73.3 | 81.4 | 18  | 32.8 | 25.3 | 44.5 | 1.8 |
| EP46   | 2021 summer | 23 July, 13:00-25 July, 16:00 | 52   | 1.50 | 29.7 | 78.2 | 71.3 | 17  | 24.0 | 19.6 | 29.3 | 1.5 |
| EP47   | 2021 summer | 27 July, 10:00-28 July, 17:00 | 32   | 1.15 | 30.4 | 78.6 | 43.9 | 19  | 23.1 | 18.6 | 27.2 | 1.5 |
| EP48   | 2021 summer | 06 Aug, 09:00-07 Aug, 13:00   | 20   | 1.49 | 28.0 | 87.7 | 26.5 | 25  | 21.1 | 16.0 | 26.9 | 1.7 |
| EP49   | 2021 summer | 11 Sep, 15:00-13 Sep, 18:00   | 52   | 1.35 | 31.0 | 76.5 | 51.4 | 16  | 21.6 | 13.4 | 29.8 | 2.2 |
| EP50   | 2021 summer | 17 Sep, 08:00-18 Sep, 03:00   | 20   | 1.67 | 28.9 | 83.5 | 79.6 | 7.7 | 28.8 | 21.8 | 36.5 | 1.7 |
| EP51   | 2021 summer | 27 Sep, 14:00-02 Oct, 03:00   | 110  | 1.43 | 28.7 | 81.2 | 55.3 | 11  | 26.7 | 16.1 | 31.8 | 2.0 |
| Non-EP | 2021 summer | 03 May, 00:00-07 Oct, 23:00   | 3462 | 2.16 | 27.8 | 85.0 | 28.0 | 9.9 | 8.40 | 6.60 | 10.2 | 1.6 |
| EP52   | 2021 fall   | 23 Oct, 15:00-23:00           | 9    | 3.44 | 19.8 | 75.6 | 20.4 | 21  | 22.8 | 16.0 | 35.6 | 2.2 |
| EP53   | 2021 fall   | 27 Oct, 12:00-22:00           | 11   | 2.40 | 24.2 | 79.7 | 66.1 | 10  | 21.9 | 18.2 | 28.2 | 1.5 |
| EP54   | 2021 fall   | 28 Oct, 12:00-29 Oct, 21:00   | 34   | 3.16 | 23.8 | 81.6 | 66.2 | 6.6 | 23.4 | 19.7 | 29.1 | 1.5 |
| EP55   | 2021 fall   | 30 Oct, 10:00-01 Nov, 20:00   | 59   | 2.95 | 23.2 | 79.1 | 58.5 | 9.7 | 27.5 | 17.2 | 33.5 | 1.9 |
| EP56   | 2021 fall   | 03 Nov, 10:00-04 Nov, 09:00   | 24   | 3.01 | 23.8 | 80.5 | 63.6 | 6.1 | 23.6 | 19.5 | 30.0 | 1.5 |
| EP57   | 2021 fall   | 15 Nov, 22:00-18 Nov, 04:00   | 55   | 2.67 | 21.7 | 73.9 | 39.2 | 8.7 | 28.3 | 20.8 | 39.8 | 1.9 |
| EP58   | 2021 fall   | 18 Nov, 17:00-20 Nov, 07:00   | 39   | 2.15 | 21.5 | 79.1 | 43.1 | 6.5 | 24.3 | 17.4 | 34.5 | 2.0 |
| Non-EP | 2021 fall   | 08 Oct, 00:00-24 Nov, 23:00   | 897  | 4.23 | 22.5 | 74.1 | 35.1 | 5.6 | 13.2 | 11.3 | 18.0 | 1.6 |
| EP59   | 2021 winter | 24 Nov, 14:00-27 Nov, 06:00   | 65   | 2.56 | 19.9 | 61.8 | 38.9 | 10  | 24.0 | 19.1 | 35.1 | 1.8 |
| EP60   | 2021 winter | 27 Nov, 18:00-01 Dec, 04:00   | 83   | 3.82 | 20.5 | 61.6 | 39.9 | 8.5 | 23.0 | 16.6 | 32.7 | 2.0 |
| EP61   | 2021 winter | 09 Dec, 14:00-10 Dec, 11:00   | 21   | 2.34 | 18.6 | 75.8 | 36.3 | 7.3 | 22.4 | 15.0 | 39.5 | 2.6 |
| EP62   | 2021 winter | 11 Dec, 15:00-15 Dec, 02:00   | 84   | 2.45 | 19.4 | 72.5 | 44.9 | 8.4 | 36.6 | 30.0 | 46.4 | 1.6 |
| EP63   | 2021 winter | 18 Dec, 19:00-20 Dec, 16:00   | 64   | 4.43 | 15.9 | 58.0 | 34.6 | 8.4 | 29.3 | 23.3 | 37.9 | 1.6 |
| EP64   | 2021 winter | 23 Dec, 19:00-26 Dec, 19:00   | 73   | 3.08 | 17.0 | 81.2 | 22.4 | 11  | 36.9 | 26.6 | 54.4 | 2.0 |
| EP65   | 2021 winter | 27 Dec, 12:00-31 Dec, 23:00   | 108  | 2.72 | 15.9 | 75.3 | 24.5 | 13  | 32.7 | 23.6 | 48.2 | 2.0 |
| Non-EP | 2021 winter | 25 Nov, 00:00-31 Dec, 23:00   | 414  | 3.63 | 18.1 | 63.2 | 36.2 | 7.2 | 15.0 | 11.9 | 21.7 | 1.8 |

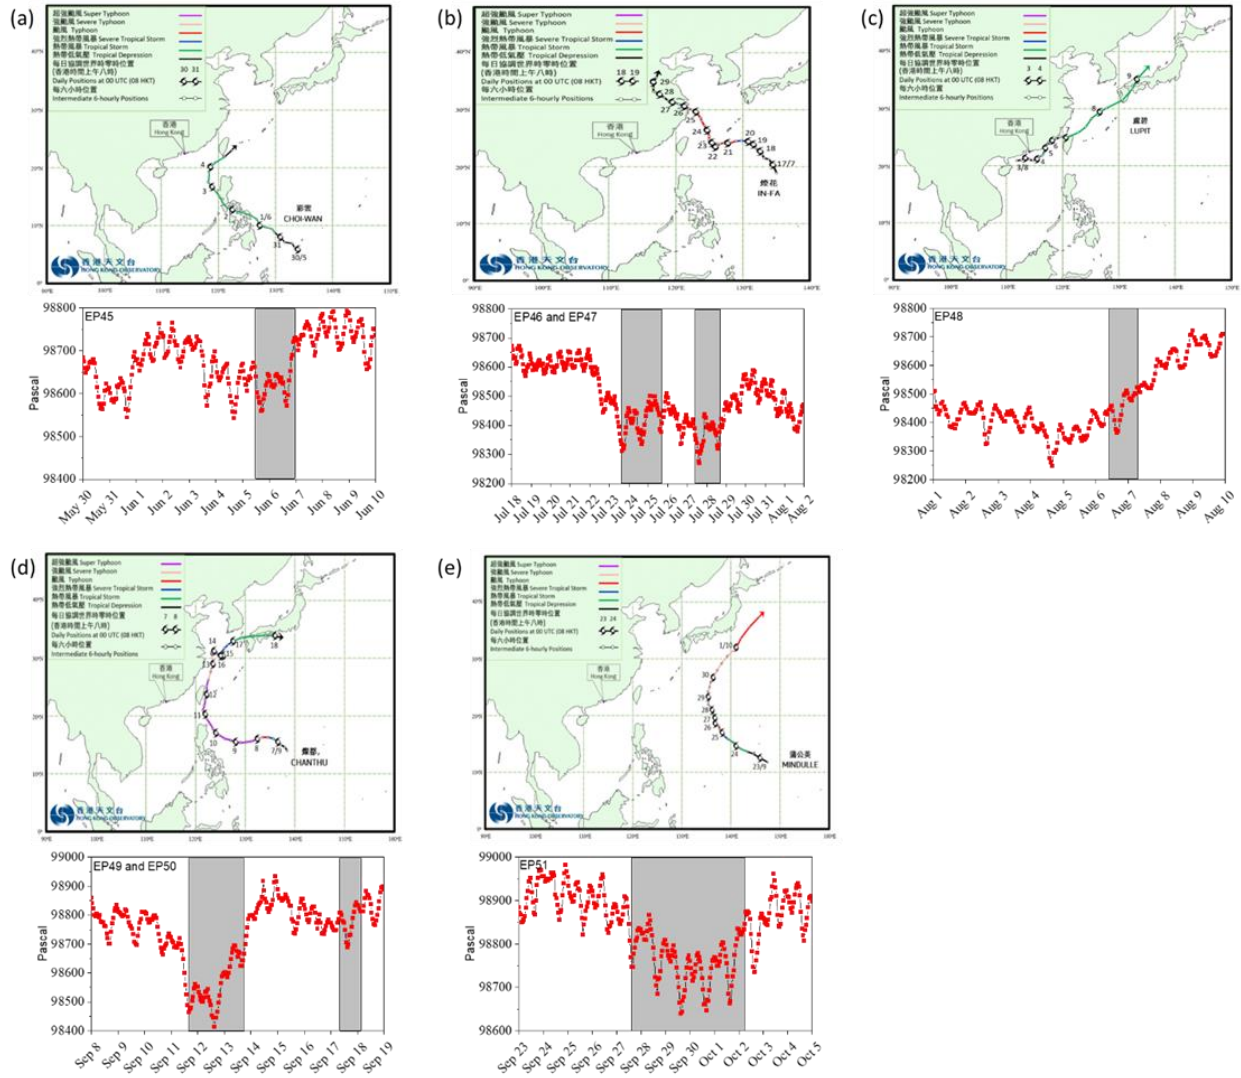

Figure S10. The provisional tropical cyclone tracks of (a) Chaiwan, (b) Infa, (c) Lupit, (d) Chanthu and (e) Mindulle together with the corresponding atmospheric pressure (pascal) at the HKUST supersite. The episode period is indicated by the grey area. The tropical cyclone tracks were obtained from Hong Kong Observatory website (<https://www.hko.gov.hk/en/publica/tc/tc2021/track.html>, lass access: May 2023).

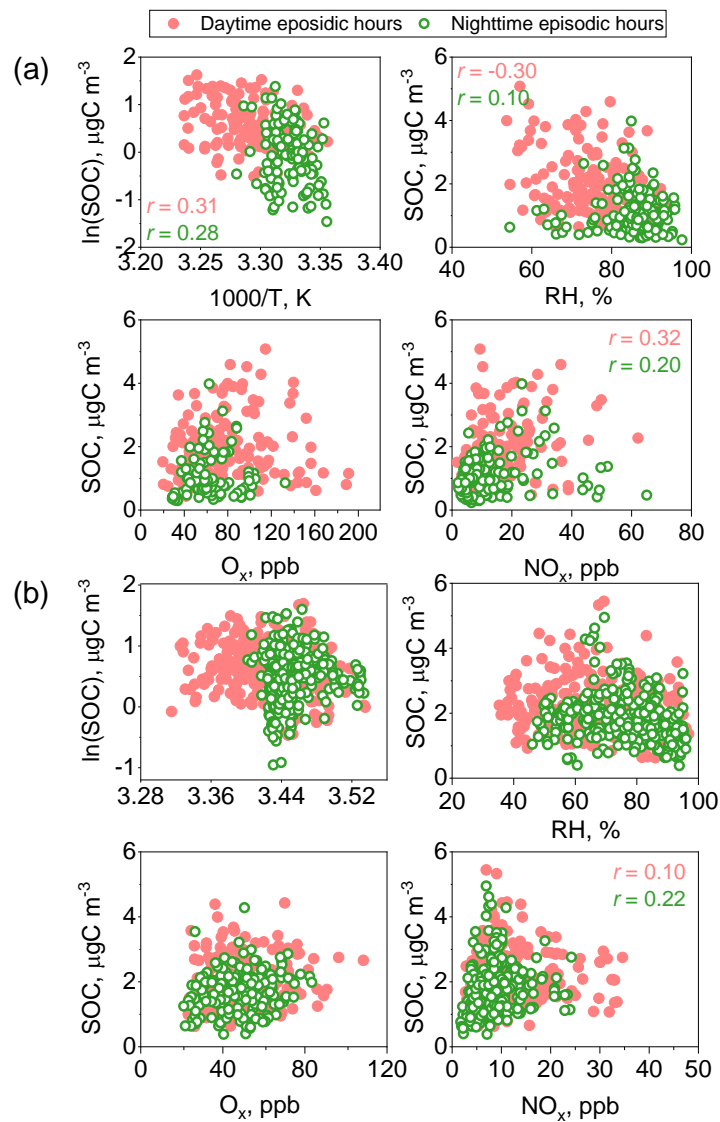

**Figure S11.** Scatter plot of SOC with meteorological parameters (i.e., temperature and RH), and oxidants (i.e.,  $\text{O}_x$  and  $\text{NO}_x$ ) during the episodic hours in (a) summer typhoon episodes and (b) winter haze episodes. The solid red circle represents daytime hours, blank green circle represents nighttime hours.

**Table S3. Statistical summary of aerosol water content and [H<sup>+</sup>] during the summer typhoon episodes and winter haze episodes during the daytime and nighttime, respectively.**

| Episodes                | Day/night | AWC ( $\mu\text{g m}^{-3}$ ) | [H <sup>+</sup> ] ( $\text{mol m}^{-3}$ ) |
|-------------------------|-----------|------------------------------|-------------------------------------------|
| Summer typhoon episodes | Day       | $12.5 \pm 8.34$              | $1.70 \pm 1.20 \text{ E-10}$              |
| Summer typhoon episodes | Night     | $23.1 \pm 23.4$              | $1.49 \pm 1.00 \text{ E-10}$              |
| Winter haze episodes    | Day       | $6.36 \pm 6.60$              | $7.51 \pm 1.80 \text{ E-11}$              |
| Winter haze episodes    | Night     | $8.86 \pm 8.47$              | $1.54 \pm 9.72 \text{ E-10}$              |

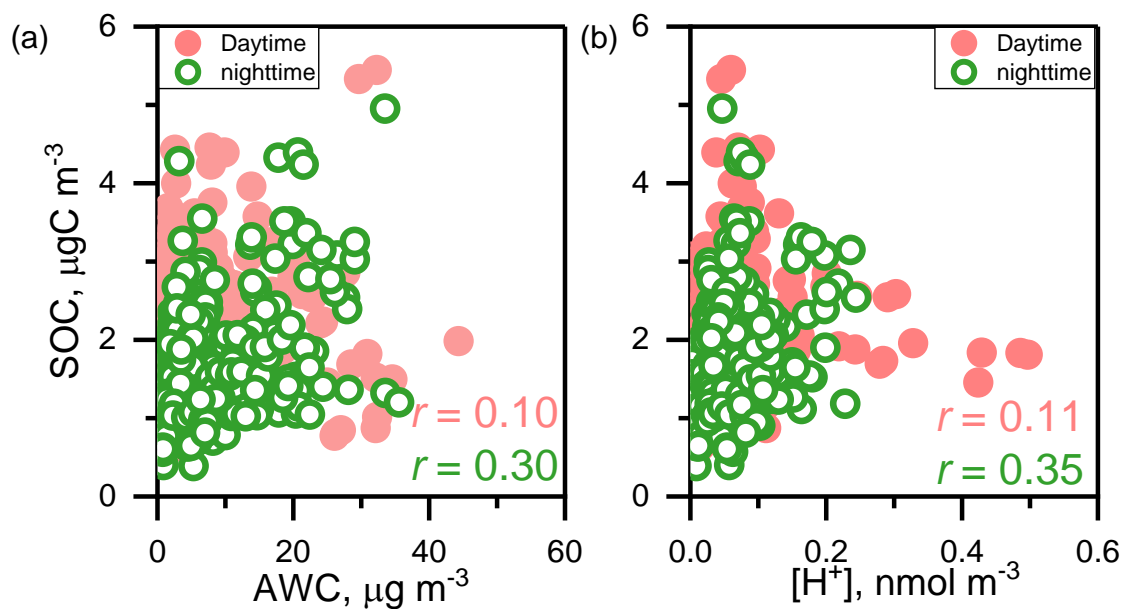

**Figure S12. Scatter plot of SOC with (a) aerosol water contents (AWC) and (b) [H<sup>+</sup>] during the winter haze episodes. The solid red circle represents daytime hours, blank green circle represents nighttime hours.**
